# Supplementary material for: Efficacy and safety of anlotinib combined with carboplatin and pemetrexed as first-line induction therapy followed by anlotinib plus pemetrexed as maintenance therapy in EGFR/ALK wild-type advanced non-squamous non-small cell lung cancer in China: a multicenter, single-arm trial
Source: PubMed Central journal article supplement — Transl Lung Cancer Res. 2022 Aug;11(8):1657–66. doi: 10.21037/tlcr-22-558 (PMC9459624; doi:10.21037/tlcr-22-558), 2022-08
Supplement: tlcr-11-08-1657-dss.pdf [file tlcr-11-08-1657-dss.pdf]

## Data Sharing Statement

|                     |                                                                                                                                                     |                                                                                                                                              |
|---------------------|-----------------------------------------------------------------------------------------------------------------------------------------------------|----------------------------------------------------------------------------------------------------------------------------------------------|
| <b>Article Info</b> | <a href="https://dx.doi.org/10.21037/tlcr-22-558">https://dx.doi.org/10.21037/tlcr-22-558</a>                                                       |                                                                                                                                              |
| <b>Item</b>         | <b>Question</b>                                                                                                                                     | <b>Authors' Response<br/>(place "-" if not applicable)</b>                                                                                   |
| 1                   | Would you like to share data collected for your study to others?                                                                                    | Yes.                                                                                                                                         |
| 2                   | If not, would you like to share the reason for your decision?                                                                                       | -                                                                                                                                            |
| 3                   | What data in particular will be shared?                                                                                                             | The survival data in particular will be shared.                                                                                              |
| 4                   | Any other documents will be shared? Such as study protocol, statistical analysis plan, informed consent form, clinical study report, analytic code. | Study protocol, informed consent form, and clinical study report will also be shared if requested.                                           |
| 5                   | When will data availability begin?                                                                                                                  | From the publication date.                                                                                                                   |
| 6                   | When will data availability end?                                                                                                                    | Two years within the publication date, since the technique or survival data may be updated over time.                                        |
| 7                   | To whom will you share the data?                                                                                                                    | Medical oncologists who are interested in studies of non-small-cell lung cancer (NSCLC).                                                     |
| 8                   | For what type of analysis or purpose?                                                                                                               | For analysis to evaluate the safety and efficacy of anlotinib in NSCLC.                                                                      |
| 9                   | How or where can the data/documents be obtained?                                                                                                    | Emails could be sent to the address below to obtain the shared data:<br><a href="mailto:qimingwang1006@126.com">qimingwang1006@126.com</a> . |
| 10                  | Any other restrictions?                                                                                                                             | We may balance the potential benefits and risks for each request and then provide the data that could be shared.                             |
